# Supplementary material
Source: publisher figshare collection journal article supplement (https://tandf.figshare.com/ndownloader/files/35113900)
Supplement: Supplementary file 1 [file 35113900]

|  | Prediction |  |  |  |  | Recall |
| --- | --- | --- | --- | --- | --- | --- |
| True  results | F0 | F1 | F2 | F3 | F4 |  |
| F0 | 60 | 13 | 9 | 11 | 7 | 0.60 |
| F1 | 21 | 72 | 19 | 11 | 7 | 0.55 |
| F2 | 11 | 26 | 60 | 25 | 8 | 0.46 |
| F3 | 10 | 11 | 17 | 82 | 10 | 0.63 |
| F4 | 7 | 11 | 17 | 12 | 73 | 0.60 |
| Precision | 0.55 | 0.54 | 0.49 | 0.58 | 0.69 |  |

Table S1

Confusion matrix of multi-classification using CNN
